# Supplementary material for: Heterogeneous Antibiotic Resistance Gene Removal Impedes Evaluation of Constructed Wetlands for Effective Greywater Treatment
Source: MDPI journal article supplement (doi:10.3390/antibiotics13040315), 2024-03-29
Supplement: s1 [file s1]

## Supplementary Materials

**RVFCW system characteristics**

The RVFCW is a decentralized system consisting of two 500 L capacity stacked containers. The upper container holds a constructed wetland bed. Raw GW is introduced directly into the plant root zone, from where it trickles through the passively aerated wetland bed. Further aeration takes place as the water drops into the lower container reservoir. From the reservoir, the water is recirculated back to the wetland bed for 6–8 hours, after which it is pumped out for landscape irrigation, either with or without a disinfection stage.

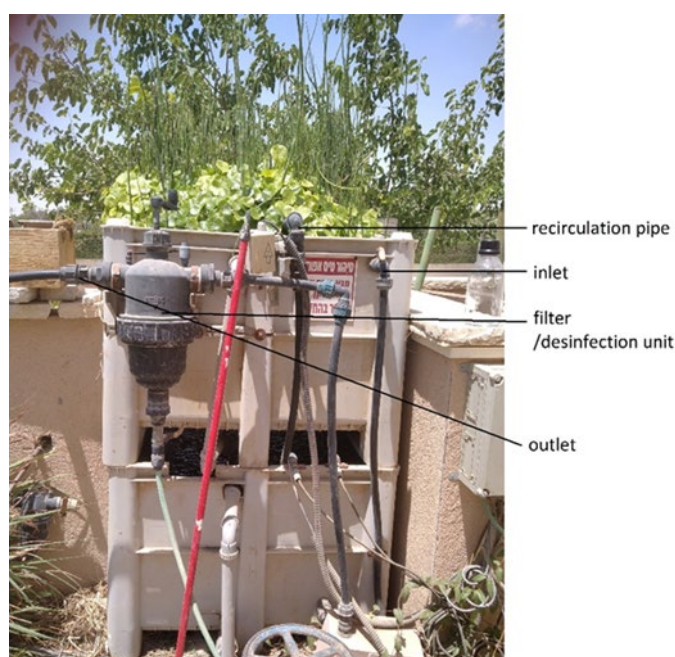

**Figure S1.** Recirculating vertical-flow-constructed wetland.

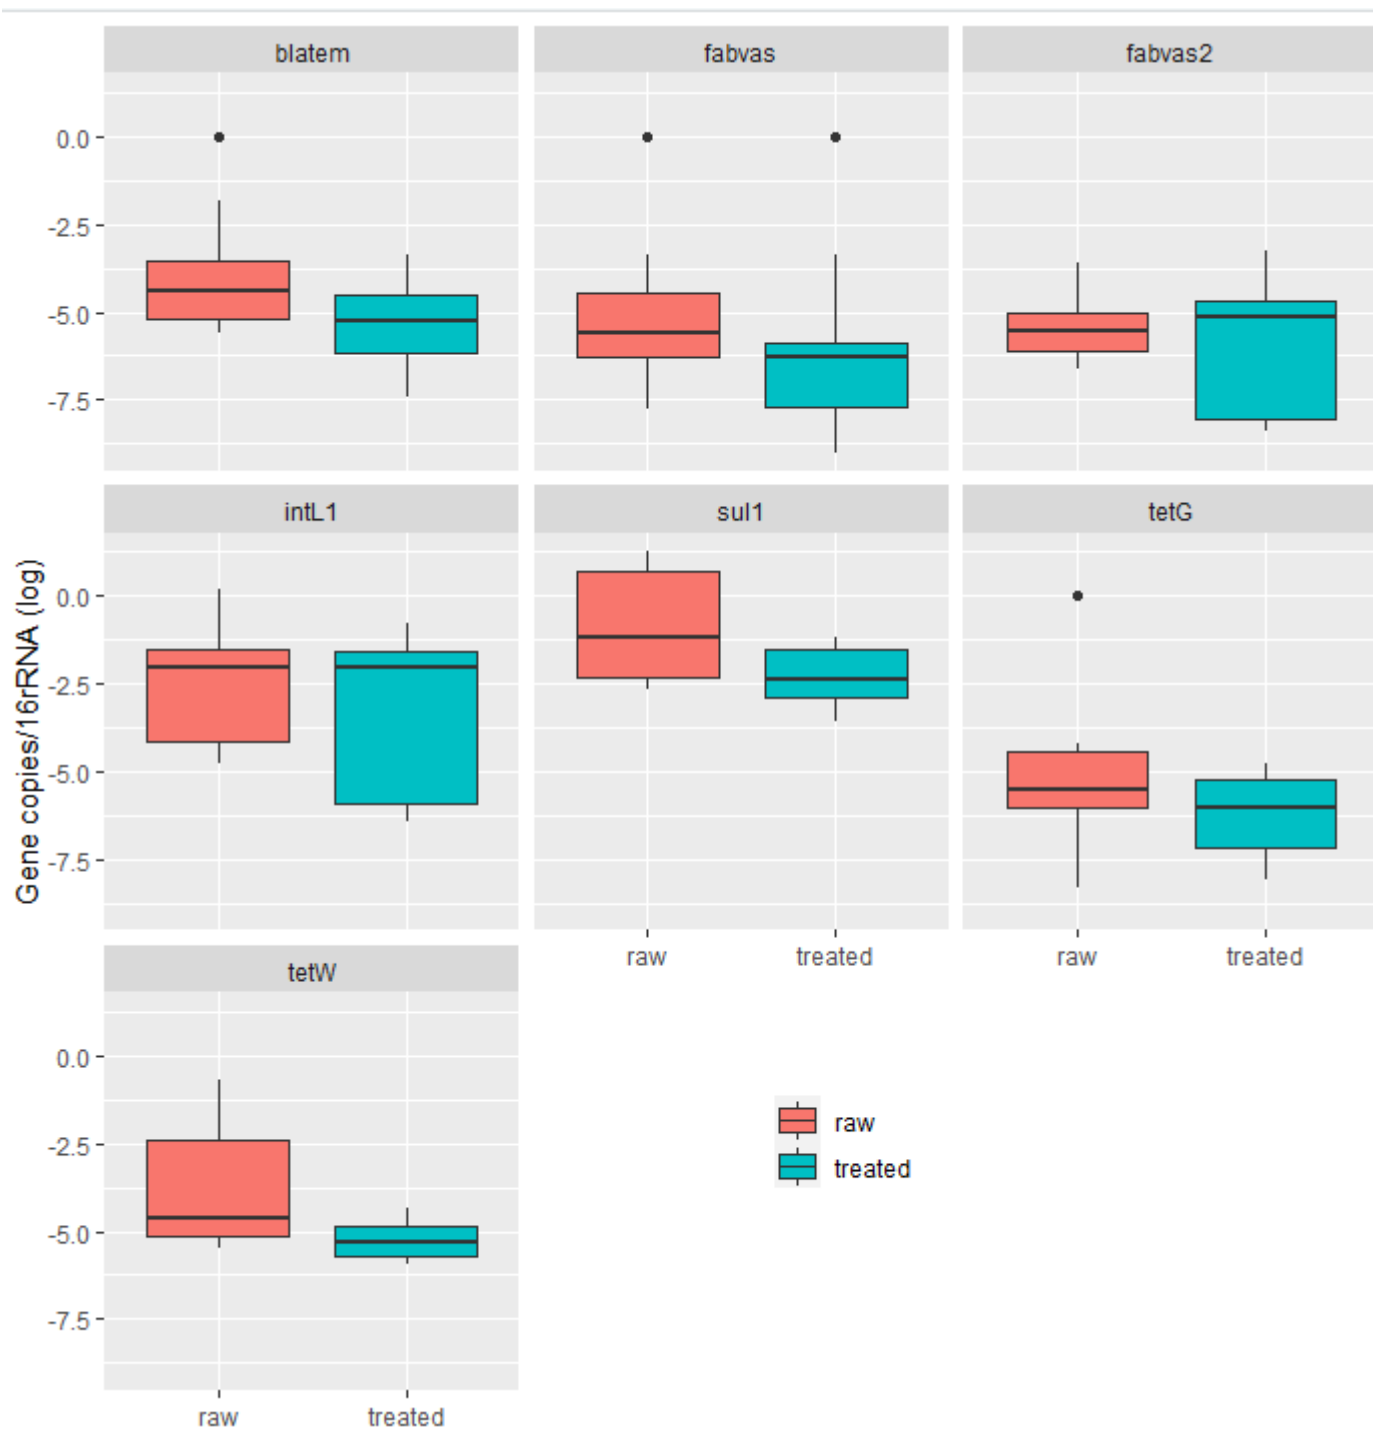

**Figure S2.** Relative abundance of antimicrobial resistance genes in greywater samples collected from different families. Data are shown on a log scale as relative gene copies normalized to the copies of 16S rRNA genes from each sample.

**Table S1.** Details of selected primers used for SmartChip™ analysis.

| Assay | Gene       | Target Antibiotics (Major) | Forward Primer                | Reverse Primer                  |
|-------|------------|----------------------------|-------------------------------|---------------------------------|
| AY1   | 16S rRNA   | 16S rRNA                   | GGGTTGCGCTCGTTGC              | ATGGYTGTCTCGTCAGCTCGTG          |
| AY6   | aac(6')-II | Aminoglycoside             | CGACCCGACTCCGAACAA            | GCACGAATCCTGCCTTCTCA            |
| AY10  | aadA_1     | Aminoglycoside             | GTTGTGCACGACGACATCATT         | GGCTCGAAGATACCTGCAAGAA          |
| AY419 | aph3-ib    | Aminoglycoside             | AACAGGTTTGGGAGGCGATG          | CGCAACAAGCCTCTCCTGAA            |
| AY326 | aph6       | Aminoglycoside             | CCCATCCCATGTGTAAGGAAA         | GCCACCGCTTCTGCTGTAC             |
| AY116 | blaCMY2    | Beta Lactam                | GCGAGCAGCCTGAAGCA             | CGGATGGGCTTGTCTCTT              |
| AY432 | blaCTX-M   | Beta Lactam                | CGTACCGAGCCGACGTAA            | CAACCCAGGAAGCAGGCA              |
| AY435 | blaOXA51   | Beta Lactam                | CGACCGAGTATGTACCTGCTTC        | TCAAGTCCAATACGACGAGCTA          |
| AY293 | intI1_1    | Integrans                  | CGAACGAGTGGCGGAGGGTG          | TACCCGAGAGCTTGGCACCCA           |
| AY202 | adeA       | MDR                        | CAGTTCGAGCGCCTATTTCTG         | CGCCCTGACCGACCAAT               |
| AY206 | cmr        | MDR                        | CGGCATCGTCAGTGAATT            | CGGTTCCGAAAAAGATGGAA            |
| AY495 | pcoA       | MDR                        | TGGCGTATGGAGTTTCAATGC         | GAATAATGCCGTGCCAGTGAA           |
| AY309 | ISPs       | MGE                        | CACACTGCAAAAACGCATCCT         | TGTCTTTGGCGTCACAGTTCTC          |
| AY523 | Tn3        | MGE                        | GCTGAGGTGTTTACGCTACATC<br>C   | GCTGAGGTAGTCACAGGCATTC          |
| AY299 | tnpA_1     | MGE                        | GCCGCACTGTCGATTTTTATC         | GCGGGATCTGCCACTTCTT             |
| AY530 | erm34      | MLSB                       | AAAGCGGTTTACAAGCGTTTC<br>G    | GGGTGCTCTAGGGTTGTTTAGTG         |
| AY534 | ermD       | MLSB                       | TTTCCGGACAGCATTTGATGC         | TCCACTGCCAATACCTTACCG           |
| AY535 | ermF       | MLSB                       | TCTGATGCCCCGAAATGTTCAA<br>G   | TGAAGGACAATTGAACCTCCCA          |
| AY68  | ermX_1     | MLSB                       | GCTCAGTGGTCCCCATGGT           | ATCCCCCGTCAACGTTT               |
| AY71  | vgaA_1     | MLSB                       | CGAGTATTGTGGAAAGCAGCT<br>AGTT | CCCGTACCGTTAGAGCCGATA           |
| AY472 | fabK       | Other                      | CAGGAGCAGGAAATCCAAGC          | CCAGCTTCCATTCCTTCTGC            |
| AY193 | mcr1_1     | Other                      | TCTTGTGGCGAGTGTTGCCGT         | CCAATGATACGCATGATAAACG<br>CTG   |
| AY218 | qacEΔ1_1   | Other                      | TCGCAACATCCGCATTAAAA          | ATGGATTTTCAAGAACAGAGAAA<br>GAAA |
| AY29  | catB3      | Phenicol                   | GCACTCGATGCCTTCCAAAA          | AGAGCCGATCCAAACGTCAT            |
| AY35  | cmlA_2     | Phenicol                   | TAGGAAGCATCGGAACGTTGA<br>T    | CAGACCGAGCACGACTGTTG            |
| AY96  | qnrB       | Quinolone                  | GCGACGTTTCACTGGTTCAGA         | GCTGCTCGCCAGTCGAA               |
| AY459 | qnrD       | Quinolone                  | CGCTGGAATGGCACTGTGA           | GCTCTCCATCCAACTTCACTCC          |
| AY245 | sul1_2     | Sulfonamide                | GCCGATGAGATCAGACGTATT<br>G    | CGCATAGCGCTGGGTTTC              |
| AY243 | sul2_1     | Sulfonamide                | TCCGGTGGAGGCCGGTATCTG<br>G    | CGGGAATGCCATCTGCCTTGAG          |
| AY248 | tetA_1     | Tetracycline               | GCTGTTTGTCTGCCGAAAA           | GGTTAAGTTCCTTGAACGCAAAC<br>T    |
| AY256 | tetC_1     | Tetracycline               | CATATCGCAATACATGCGAAA<br>AA   | AAAGCCGCGGTAAATAGCAA            |

|       |       |              |                              |                         |
|-------|-------|--------------|------------------------------|-------------------------|
| AY263 | tetW  | Tetracycline | ATGAACATTCCCACCGTTATCT<br>TT | ATATCGGCGGAGAGCTTATCC   |
| AY579 | dfrA1 | Trimethoprim | CGGATCATGTCATTGTTTCAGG       | ATGTTAGAGGCGAAGTCTTGG   |
| AY595 | vanA  | Vancomycin   | GGGCTGTGAGGTCGGTTG           | TTCAGTACAATGCGGCCGTTA   |
| AY170 | vanXB | Vancomycin   | AGGCACAAAATCGAAGATGCT<br>T   | GGGTATGGCTCATCAATCAACTT |
| AY169 | vanXD | Vancomycin   | TAAACCGTGTTATGGGAACGA<br>A   | GCGATAGCCGTCCCATAAGA    |

### Physicochemical parameters of greywater

This study analyzed physicochemical parameters for all raw and treated samples from different households to align with the microbial community. Values of raw GW are shown in Table 4, and values of the treated GW are displayed in Table 5. For raw GW, the homes were sampled twice in successive months; therefore, the values are shown for all five households together. The mean pH value is 7.64 for EC 856  $\mu\text{S}/\text{cm}$ . The mean value of TSS is reported at 18.7 mg/L. The average BOD value in the samples is 28.4 mg/L, while the observed TOC value is 18 mg/L. The mean value of TN is detected at 9.8 mg/L. For treated GW, mean pH values ranged from 7.25 to 8.08, and values of EC obtained for the samples ranged from 459.9 to 659.7  $\mu\text{S}/\text{cm}$ . Measured values of TSS varied considerably among the samples ranging from 1.1 to 19.1 mg/L. The average BOD values in the samples ranged from 2.9 to 10 mg/L, while observed TOC values ranged from 3.9 to 9.8 mg/L. The mean values of TN ranged from 2.6 to 14.9 mg/L. The values did not vary significantly among the different households and during the years, meaning the systems are stable and well-established.

Based on both tables, it can be concluded that the RVFCW system effectively removes chemical and biological contaminants. Overall, it reduces BOD and TSS by 80%, TOC by 60%, TN by 30%, and turbidity by 90%. These findings coincide with Gross et al. (2006), reconfirming that the RVFCW is a sustainable and promising treatment system for GW use.

**Table S2.** Average level of treated greywater parameters during 2015–2021, shown for each household separately.

| parameter        | Household 1 |                     | Household 2 |                     | Household 3 |                    | Household 4 |                     | Household 5 |                     |
|------------------|-------------|---------------------|-------------|---------------------|-------------|--------------------|-------------|---------------------|-------------|---------------------|
|                  | range       | mean $\pm$ st dev   | range       | mean $\pm$ st dev   | range       | mean $\pm$ st dev  | range       | mean $\pm$ st dev   | range       | mean $\pm$ st dev   |
| pH               | 6.1–7.85    | 7.25 $\pm$ 0.52     | 6.63–9.92   | 7.67 $\pm$ 0.85     | 6.3–9.57    | 7.71 $\pm$ 0.96    | 6.65–8.12   | 7.47 $\pm$ 0.52     | 6.48–10.16  | 8.08 $\pm$ 1.05     |
| EC [ $\mu$ s/cm] | 346–995     | 578.25 $\pm$ 177.23 | 364–984     | 659.73 $\pm$ 191.67 | 329–993     | 638.3 $\pm$ 214.37 | 335–623     | 486.88 $\pm$ 104.27 | 321–671     | 459.91 $\pm$ 114.63 |
| Turbidity [NTU]  | 0–66        | 19.14 $\pm$ 20.02   | 0–68        | 14.43 $\pm$ 20.41   | 0–43.2      | 8.21 $\pm$ 14.47   | 0–6.05      | 1.11 $\pm$ 2.1      | 0–13.52     | 2.42 $\pm$ 4.29     |
| BOD [mg/L]       | 1.35–14.4   | 6.54 $\pm$ 3.56     | 0.45–9.99   | 4.51 $\pm$ 3.18     | 0.8–47      | 10 $\pm$ 14.7      | 0.72–6.6    | 2.95 $\pm$ 2.15     | 1.2–21.9    | 4.54 $\pm$ 6.05     |
| TSS [g/L]        | 0.01–47     | 9.93 $\pm$ 15.81    | 0.001–47    | 5.83 $\pm$ 14.37    | 0.001–7     | 1.0 $\pm$ 2.16     | 0.001–2     | 0.25 $\pm$ 0.71     | 0.001–4     | 0.8 $\pm$ 1.3       |
| TOC [mg/l]       | 4.56–17.8   | 9.61 $\pm$ 4.41     | 1.68–39.1   | 9.82 $\pm$ 11.91    | 2.74–21.74  | 7.61 $\pm$ 5.91    | 2.67–7.37   | 1.48 $\pm$ 3.95     | 2.9–9.68    | 5.26 $\pm$ 1.93     |
| TN [mg/l]        | 1.32–12.85  | 6.92 $\pm$ 4.11     | 1.66–38.3   | 14.9 $\pm$ 10.11    | 0.62–9.72   | 3.7 $\pm$ 2.82     | 0.4–18.22   | 5.71 $\pm$ 5.91     | 0.42–6.63   | 2.57 $\pm$ 2.07     |

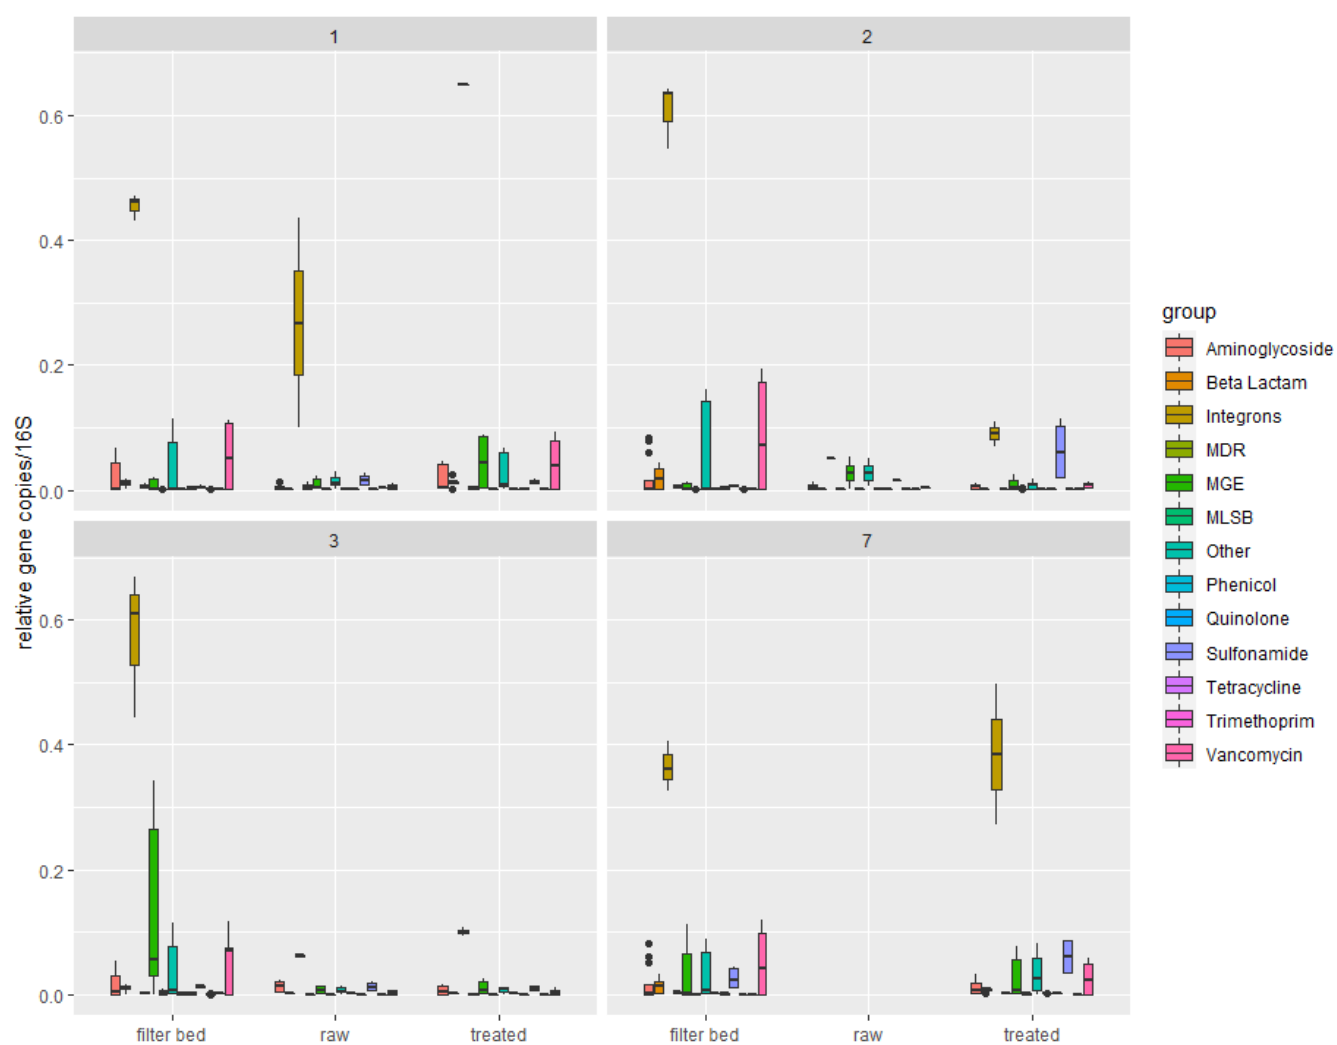

**Figure S3.** The relative abundance of ARGs for each sample, clustered according to each household.

**Table S3:** Correlation between ARGs and emerging micropollutants as detected in soil samples. Numbers in bold indicate a relationship.

|                  | <i>fabvas2</i> | <i>tetW</i> | <i>tetG</i>  | <i>blatem</i> |
|------------------|----------------|-------------|--------------|---------------|
| Ethylparaben     | 0.35           | 0.10        | -0.47        | -0.26         |
| Methylparaben    | <b>0.55</b>    | 0.33        | <b>-0.69</b> | -0.25         |
| Octocrylene      | -0.22          | -0.26       | 0.46         | -0.21         |
| Propylparaben    | 0.35           | 0.15        | <b>-0.51</b> | -0.21         |
| Sulfamethoxazole | <b>0.59</b>    | 0.37        | -0.53        | -0.19         |
| Tonalid          | -0.17          | -0.16       | -0.35        | -0.49         |
| Triclosan        | 0.35           | 0.15        | -0.51        | -0.21         |

The results showed that of the observed seven micropollutants in the soil, only three had a correlation with the detected genes, of which none had a strong relation. The gene *fabvas2* has a positive correlation with methylparaben and sulfamethoxazole, and the gene *tetG* has a negative correlation with methylparaben and propylparaben.

**Table S4.** Short read-based antimicrobial resistance gene identification.

| House 1                             | House 1                  | House 2                            | House 2                  | House 3                          | House 3                  |
|-------------------------------------|--------------------------|------------------------------------|--------------------------|----------------------------------|--------------------------|
| treated greywater-irrigated soil    | greywater-irrigated soil | treated greywater-irrigated soil   | greywater-irrigated soil | treated greywater-irrigated soil | greywater-irrigated soil |
| <i>Acinetobacter baumannii</i> AbaQ |                          | AER-1                              |                          | ACI-1                            |                          |
| OpmH                                |                          | CAM-1                              |                          | CRP                              |                          |
| Txr                                 |                          | LRA-19                             |                          | dfrA22                           |                          |
| adeF                                | adeG                     | <i>Pseudomonas aeruginosa</i> soxR |                          | mel                              |                          |
| sul2                                |                          | adeF                               |                          | ramA                             |                          |
| tet(49)                             |                          | adeJ                               |                          | sul4                             |                          |
| vanHF                               | vanXI                    | adeK                               |                          | tet(A)                           | tet(56)                  |
|                                     |                          | mphC                               |                          |                                  | ErmY                     |
|                                     |                          | tet(A)                             |                          |                                  | vanXF                    |
|                                     |                          |                                    | vanF                     |                                  |                          |

Overlapping ARGs across soil samples are rare; this trend is similar to the greywater samples. Tracing from treated greywater to greywater irrigated soil in the same household, no overlapping ARGs were found.

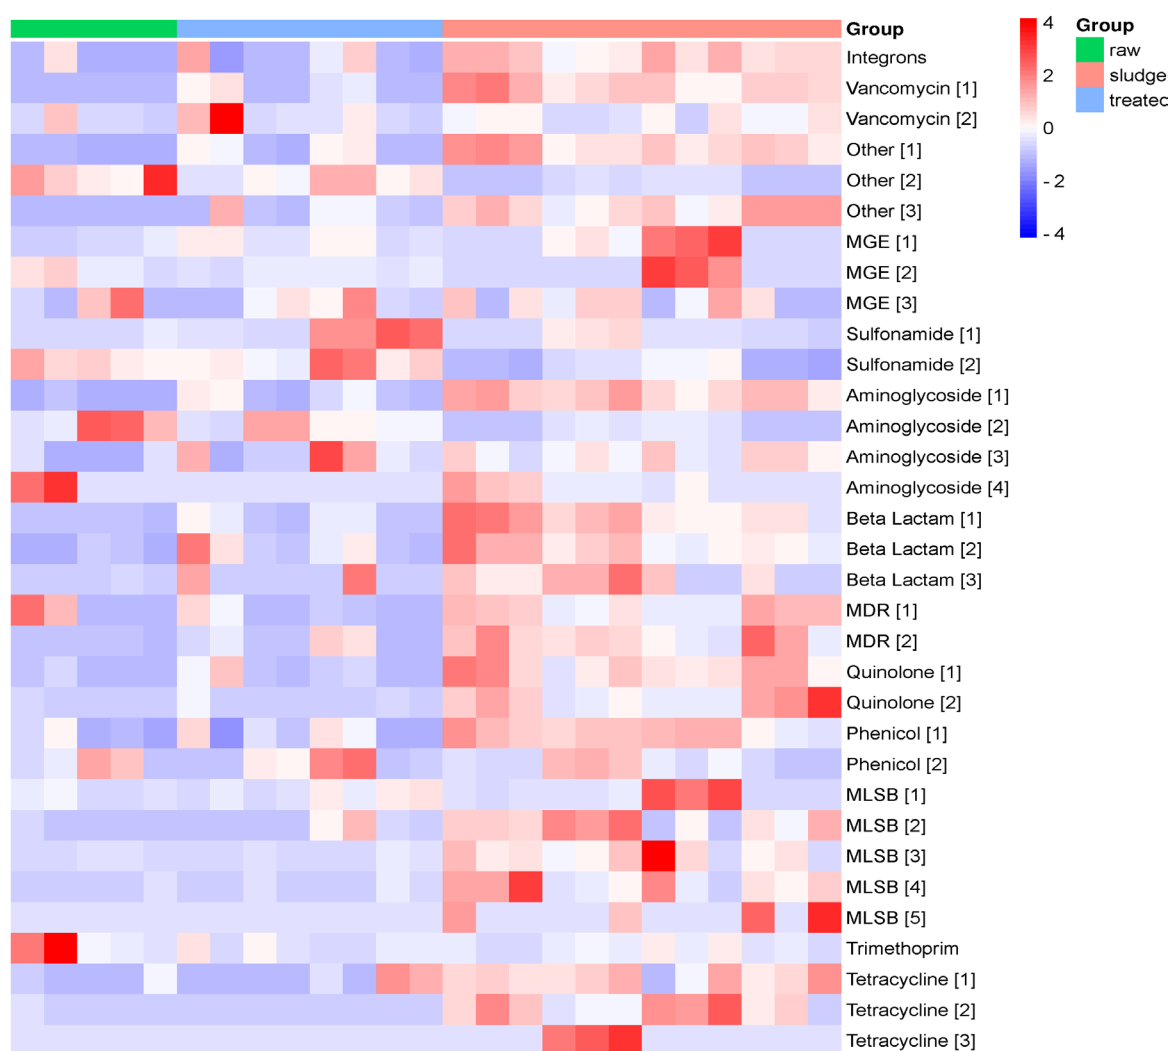

**Figure S4.** Heatmap showing the composition of gene abundances relative to the 16S rRNA gene. The color bar on the right means relative abundance from low (blue) to high (red) levels.
